# Supplementary material for: Evaluating the impact of a hand-crafted 3D-Printed head Model and virtual reality in skull base surgery training
Source: PubMed Central journal article supplement (PMC11718289; doi:10.1016/j.bas.2024.104163), 2024-12-12
Supplement: mmc1.pdf [file mmc1.pdf]

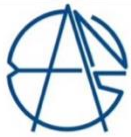

THE EUROPEAN ASSOCIATION  
OF NEUROSURGICAL SOCIETIES

# 1<sup>st</sup> LAUSANNE NET Lab SKULL BASE COURSE 3D PRINTED HEAD MODELS WITH TUMORS

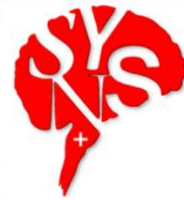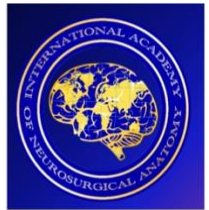

## COURSE EVALUATION - TRAINEES

### 1. General information

|                                                                                        |                |  |
|----------------------------------------------------------------------------------------|----------------|--|
| <b>Name</b>                                                                            |                |  |
| <b>Sex (male/female)</b>                                                               |                |  |
| <b>Age (years)</b>                                                                     |                |  |
| <b>Hospital</b>                                                                        |                |  |
| <b>Years of neurosurgical training</b>                                                 |                |  |
| <b>Current position (junior resident/senior resident/fellow/attending)</b>             |                |  |
| <b>Previous skull base-dedicated training (e.g., fellowship)</b>                       |                |  |
| <b>Dominant hand (left/right/ambidextrous)</b>                                         |                |  |
| <b>Number of previous experiences with 3D-printed models in neurosurgical training</b> |                |  |
| <b>Number of skull base surgeries</b>                                                  | Observed       |  |
|                                                                                        | Assisted       |  |
|                                                                                        | First operator |  |

## 2. Pre- and post-course questionnaires completed by trainees

1 = Strongly disagree

2 = Disagree

3 = Neutral

4 = Agree

5 = Strongly agree

|                                                                                                                     | 1 | 2 | 3 | 4 | 5 |
|---------------------------------------------------------------------------------------------------------------------|---|---|---|---|---|
| <b>PRE-COURSE</b>                                                                                                   |   |   |   |   |   |
| <b>Pre-course assessment</b>                                                                                        |   |   |   |   |   |
| I am familiar with the relevant anatomical structures involved in the skull base approaches depicted in this model. |   |   |   |   |   |
| I understand the spatial relationships between the key skull base anatomical structures.                            |   |   |   |   |   |
| I know the key surgical steps involved in the performance of the skull base approaches depicted in this model.      |   |   |   |   |   |
| I am confident in my understanding of the steps involved in the skull base approaches depicted in this model.       |   |   |   |   |   |
| I am comfortable with handling the instruments used in skull base surgery.                                          |   |   |   |   |   |

|                                                                                                                |  |  |  |  |  |
|----------------------------------------------------------------------------------------------------------------|--|--|--|--|--|
| <b>POST-COURSE</b>                                                                                             |  |  |  |  |  |
| <b>Anatomical accuracy</b>                                                                                     |  |  |  |  |  |
| The model effectively captured the key anatomical structures involved in the studied skull base approaches.    |  |  |  |  |  |
| The details of the anatomical structures were clear and precise.                                               |  |  |  |  |  |
| The model effectively captured the displacement of the anatomical structures by the tumor.                     |  |  |  |  |  |
| <b>Realism and tactile feedback</b>                                                                            |  |  |  |  |  |
| <b>- Bone</b>                                                                                                  |  |  |  |  |  |
| The texture and handling of the tissues were realistic compared to actual human tissues.                       |  |  |  |  |  |
| The model accurately replicates the interaction between surgical instruments and tissues.                      |  |  |  |  |  |
| The consistency of the bone in the model behaved in a realistic way.                                           |  |  |  |  |  |
| The positioning of the model and thereby the anatomical structures reflected the actual set-up during surgery. |  |  |  |  |  |
| The color code chosen for the anatomical structures was realistic.                                             |  |  |  |  |  |
| <b>- Dura</b>                                                                                                  |  |  |  |  |  |
| The texture and handling of the tissues were realistic compared to actual human tissues.                       |  |  |  |  |  |
| The model accurately replicates the interaction between surgical instruments and tissues.                      |  |  |  |  |  |
| The consistency of the dura in the model behaved in a realistic way.                                           |  |  |  |  |  |

|                                                                                                                       |  |  |  |  |  |
|-----------------------------------------------------------------------------------------------------------------------|--|--|--|--|--|
| The positioning of the model and thereby the anatomical structures reflected the actual set-up during surgery.        |  |  |  |  |  |
| The color code chosen for the anatomical structures was realistic.                                                    |  |  |  |  |  |
| <b>- Brain parenchyma</b>                                                                                             |  |  |  |  |  |
| The texture and handling of the tissues were realistic compared to actual human tissues.                              |  |  |  |  |  |
| The model accurately replicates the interaction between surgical instruments and tissues.                             |  |  |  |  |  |
| The consistency of the brain in the model behaved in a realistic way.                                                 |  |  |  |  |  |
| The positioning of the model and thereby the anatomical structures reflected the actual set-up during surgery.        |  |  |  |  |  |
| The color code chosen for the anatomical structures was realistic.                                                    |  |  |  |  |  |
| <b>- Nerves</b>                                                                                                       |  |  |  |  |  |
| The texture and handling of the tissues were realistic compared to actual human tissues.                              |  |  |  |  |  |
| The model accurately replicates the interaction between surgical instruments and tissues.                             |  |  |  |  |  |
| The consistency of the nerves in the model behaved in a realistic way.                                                |  |  |  |  |  |
| The positioning of the model and thereby the anatomical structures reflected the actual set-up during surgery.        |  |  |  |  |  |
| The color code chosen for the anatomical structures was realistic.                                                    |  |  |  |  |  |
| The neurophysiology simulation was realistic.                                                                         |  |  |  |  |  |
| <b>- Tumor</b>                                                                                                        |  |  |  |  |  |
| The texture and handling of the tissues were realistic compared to actual human tissues.                              |  |  |  |  |  |
| The model accurately replicates the interaction between surgical instruments and tissues.                             |  |  |  |  |  |
| The consistency of the tumors in the model behaved in a realistic way.                                                |  |  |  |  |  |
| The positioning of the model and thereby the anatomical structures reflected the actual set-up during surgery.        |  |  |  |  |  |
| The color code chosen for the anatomical structures was realistic.                                                    |  |  |  |  |  |
| <b>Educational value</b>                                                                                              |  |  |  |  |  |
| The learning objectives were well-aligned with the design and complexity of the model.                                |  |  |  |  |  |
| This model serves as a valuable tool for novice neurosurgery residents with limited experience in skull base surgery. |  |  |  |  |  |
| I would recommend the use of this model to other neurosurgery residents.                                              |  |  |  |  |  |
| The model effectively helps in developing the necessary skills for skull base surgery.                                |  |  |  |  |  |
| The simulation improved my skills.                                                                                    |  |  |  |  |  |
| The simulation improved my knowledge of surgical neuroanatomy.                                                        |  |  |  |  |  |
| <b>Usability</b>                                                                                                      |  |  |  |  |  |
| Overall, the model is easy to set up and use.                                                                         |  |  |  |  |  |
| I found it easy to navigate and maneuver within the model.                                                            |  |  |  |  |  |
| <b>Virtual reality simulation</b>                                                                                     |  |  |  |  |  |

|                                                                                                                     |  |  |  |  |  |
|---------------------------------------------------------------------------------------------------------------------|--|--|--|--|--|
| The virtual reality simulation helped me understand the studied skull base approaches.                              |  |  |  |  |  |
| <b>Post-course assessment</b>                                                                                       |  |  |  |  |  |
| I am familiar with the relevant anatomical structures involved in the skull base approaches depicted in this model. |  |  |  |  |  |
| I understand the spatial relationships between the key skull base anatomical structures.                            |  |  |  |  |  |
| I know the key surgical steps involved in the performance of the skull base approaches depicted in this model.      |  |  |  |  |  |
| I am confident in my understanding of the steps involved in the skull base approaches depicted in this model.       |  |  |  |  |  |
| I am comfortable with handling the instruments used in skull base surgery.                                          |  |  |  |  |  |
| <b>Lectures</b>                                                                                                     |  |  |  |  |  |
| The microsurgical neuroanatomy of the skull base approaches was well presented.                                     |  |  |  |  |  |
| The description of the surgical approaches was useful.                                                              |  |  |  |  |  |
| The case description with operative videos and 3D-printed model videos was useful.                                  |  |  |  |  |  |
| <b>Faculty</b>                                                                                                      |  |  |  |  |  |
| The faculty guided me to perform the studied skull base approaches on the model.                                    |  |  |  |  |  |
| The presence of the faculty during the dissections was necessary.                                                   |  |  |  |  |  |

### 3. Open-ended feedback

Please provide any additional comments or suggestions regarding the course.
