# Supplementary material for: Evaluating the impact of a hand-crafted 3D-Printed head Model and virtual reality in skull base surgery training
Source: PubMed Central journal article supplement (PMC11718289; doi:10.1016/j.bas.2024.104163), 2024-12-12
Supplement: mmc2.pdf [file mmc2.pdf]

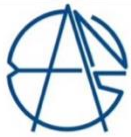

THE EUROPEAN ASSOCIATION  
OF NEUROSURGICAL SOCIETIES

# 1<sup>st</sup> LAUSANNE NET Lab SKULL BASE COURSE 3D PRINTED HEAD MODELS WITH TUMORS

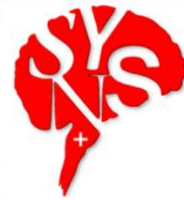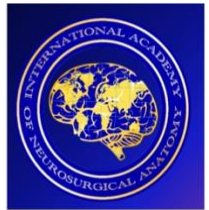

## COURSE EVALUATION - FACULTY

### 1. General information

|                                                                                        |                |  |
|----------------------------------------------------------------------------------------|----------------|--|
| <b>Name</b>                                                                            |                |  |
| <b>Sex (male/female)</b>                                                               |                |  |
| <b>Age (years)</b>                                                                     |                |  |
| <b>Hospital</b>                                                                        |                |  |
| <b>Years of neurosurgical training</b>                                                 |                |  |
| <b>Current position (junior resident/senior resident/fellow/attending)</b>             |                |  |
| <b>Previous skull base-dedicated training (e.g., fellowship)</b>                       |                |  |
| <b>Dominant hand (left/right/ambidextrous)</b>                                         |                |  |
| <b>Number of previous experiences with 3D-printed models in neurosurgical training</b> |                |  |
| <b>Number of skull base surgeries</b>                                                  | Observed       |  |
|                                                                                        | Assisted       |  |
|                                                                                        | First operator |  |

## 2. Post-course questionnaire completed by faculty

1 = Strongly disagree

2 = Disagree

3 = Neutral

4 = Agree

5 = Strongly agree

|                                                                                                                       | 1 | 2 | 3 | 4 | 5 |
|-----------------------------------------------------------------------------------------------------------------------|---|---|---|---|---|
| <b>Model accuracy and realism</b>                                                                                     |   |   |   |   |   |
| The model effectively captured the key anatomical features involved in the studied skull base approaches.             |   |   |   |   |   |
| The texture and responsiveness of the tissues in the model closely mimicked those of real tissue.                     |   |   |   |   |   |
| <b>Learning goals and educational value</b>                                                                           |   |   |   |   |   |
| The learning objectives were well-aligned with the design and complexity of the model.                                |   |   |   |   |   |
| This model serves as a valuable tool for novice neurosurgery residents with limited experience in skull base surgery. |   |   |   |   |   |
| I would recommend the use of this model to other neurosurgery residents.                                              |   |   |   |   |   |
| This model could serve as a tool for neurosurgical skills examination.                                                |   |   |   |   |   |

## 3. Open-ended feedback

Please provide any additional comments or suggestions regarding the course.
